# Supplementary material
Source: Royal Society of Chemistry journal article supplement (doi:10.1039/d6nj01158f)

**Exploring the Intriguing Terpyridine World: Synthesis, Structural, Optical, and Theoretical Insights Into Bis(p-phenyl-2,2':6',2'')terpyridine**

Edward Calvache<sup>a</sup>, Andrea Pastrana-Dávila<sup>b</sup>, Emerson Rengifo<sup>c</sup>, Mario Macias<sup>d</sup>, Oscar Rojas<sup>e</sup>, Dominik Pentlehner<sup>e</sup>, Danny Arteaga<sup>a</sup> and Richard D'Vries<sup>a\*</sup>

**Supp. Inf. S1.** <sup>1</sup>H-NMR spectrum of **Bis-TPY-Bulk**

**Supp. Inf. S2.** FT-IR spectra, table of bands assignement and analysis of **Bis-TPY-Bulk** and **Bis-TPY-Crys**

**Supp. Inf. S3.** HOMO and LUMO orbitals of *anti-anti*, *syn-syn-A*, and *syn-syn-B* conformers

**Supp. Inf. S4.** Experimental and calculated UV-Vis spectra of **Bis-TPY-Bulk** and **Bis-TPY-Crys** in DMSO



Supp. Inf. S2. FT-IR spectra, table of bands assignment and analysis of **Bis-TPY-Bulk** and **Bis-TPY-Crys**

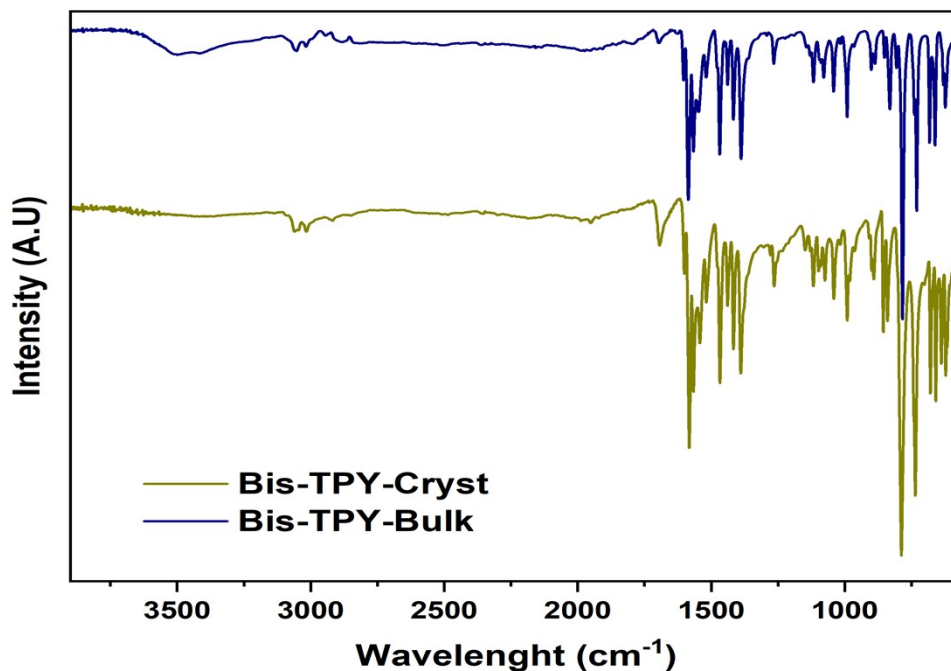

Table 1. Bands assignment for **Bis-TPY-Bulk** and **Bis-TPY-Crys**.

| Band assignment                                    | Bis-TPY-Bulk wavenumber (cm <sup>-1</sup> ) | Bis-TPY-Crys wavenumber (cm <sup>-1</sup> ) |
|----------------------------------------------------|---------------------------------------------|---------------------------------------------|
| $\nu(\text{O-H})$ stretching                       | 3510-3410                                   | Not observed                                |
| $\nu(\text{C-H})$ aromatic                         | 3052, 3016, 2944                            | 3061, 3043, 3016, 2918                      |
| $\nu(\text{C=N}) + \nu(\text{C=C})$ stretching     | 1603, 1585                                  | 1600, 1582                                  |
| $\nu(\text{C=C})$ internal vibration               | 1567, 1547                                  | 1567, 1542                                  |
| $\delta(\text{C-H}) + \nu(\text{C=C})$ deformation | 1468, 1438                                  | 1466, 1439                                  |
| $\delta(\text{C-H})$ deformation                   | 1388                                        | 1389                                        |
| $\nu(\text{C-N})$ stretching                       | 1265                                        | 1264                                        |
| $\gamma(\text{C-H})$ out-plane                     | 783                                         | 788                                         |

FT-IR analysis revealed slight differences in the spectra of the two solids. In Supp. Inf. S2, the band assignment and FT-IR spectra for both compounds are present. **Bis-TPY-Bulk** exhibits a broad band at 3510-3410 cm<sup>-1</sup> that is attributed to the O-H vibration of residual adsorbed water in the sample. This band is not present in **Bis-TPY-Crys**. The C-H bands around 3000 cm<sup>-1</sup> show a slight shift towards higher wavenumbers due to the presence of hydrogen bonds in **Bis-TPY-Crys**. Intramolecular hydrogen bonds polarize the C=C bond, as evidenced by an increased intensity of the bands around 1600-1580 cm<sup>-1</sup> (see Supp. Inf. S2). This evidence indicates that the molecule has two different structural arrangements, suggesting the possibility of isomerization. The weak band observed around 1690 cm<sup>-1</sup> is attributed to the  $\delta(\text{H-O-H})$  bending vibration of adsorbed water, which is consistent with the presence of a broad band in the 3200–3600 cm<sup>-1</sup> region corresponding to the stretching vibration of the O–H bond in water.

**Supp. Inf. S3.** HOMO and LUMO orbitals of *anti-anti*, *syn-syn-A*, and *syn-syn-B* conformers

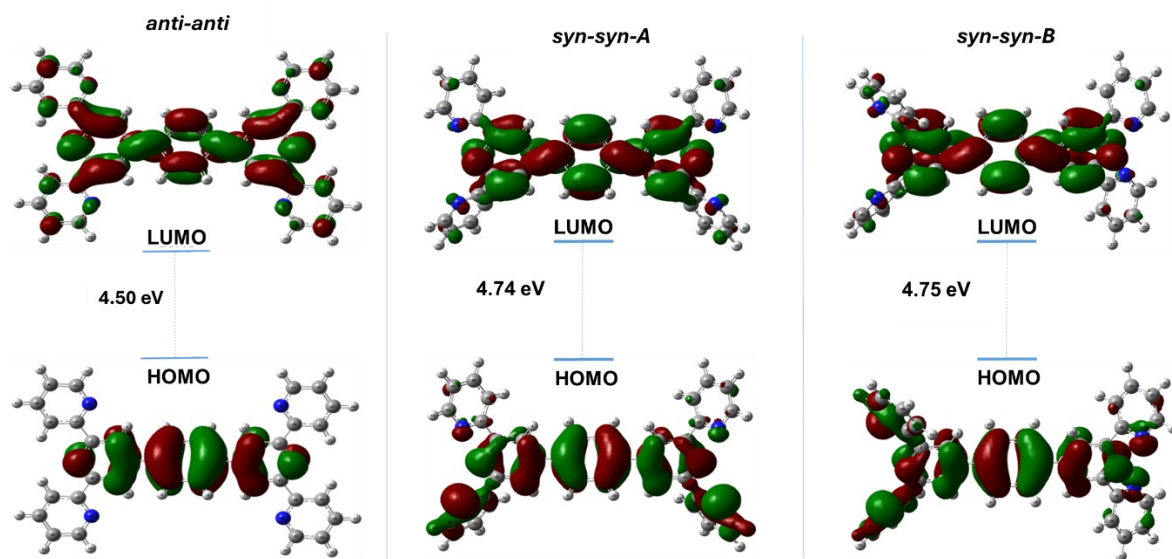

**Supp. Inf. S4.** Experimental and calculated UV-Vis spectra of **Bis-TPY-Bulk** and **Bis-TPY-Cryst** in DMSO

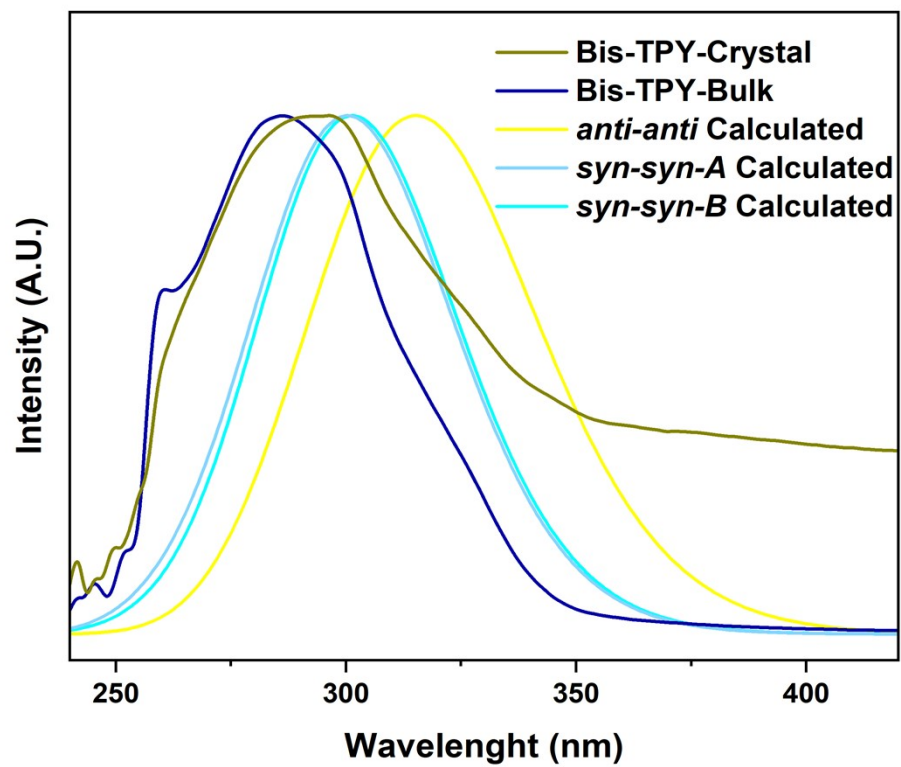

Supplement: d6nj01158f1.pdf [file d6nj01158f1.pdf]
